# Supplementary material for: Stoichiometric balance of protein copy numbers is measurable and functionally significant in a protein-protein interaction network for yeast endocytosis
Source: PLoS Comput Biol. 2018 Mar 8;14(3):e1006022. doi: 10.1371/journal.pcbi.1006022 (PMC5860782; doi:10.1371/journal.pcbi.1006022)
Supplement: S2 Table — (XLSX) [file pcbi.1006022.s003.xlsx]

## Sheet: Sheet1
	CME Network (Yeast)			ErbB Network (Humans)
	All copy numbers from Kulak, 2014			Copy numbers pulled from five different studies
	Protein	Copy Number		Protein	Copy Number	Source		References
	ABP1	30791		ABI1	67031	Kulak, 2014
	ACT1	117202		AKT1	26277	Kulak, 2014		Kulak NA, Pichler G, Paron I, Nagaraj N, Mann M. Minimal, encapsulated proteomic-sample processing applied to copy-number estimation in eukaryotic cells. Nat Methods. 2014;11(3):319-24.
	AIM21	1978		APPL1	99337	Kulak, 2014		Hein MY, Hubner NC, Poser I, Cox J, Nagaraj N, Toyoda Y, et al. A human interactome in three quantitative dimensions organized by stoichiometries and abundances. Cell. 2015;163(3):712-23.
	AIM3	220		ARAF	50606	Kulak, 2014		Nagaraj N, Wisniewski JR, Geiger T, Cox J, Kircher M, Kelso J, et al. Deep proteome and transcriptome mapping of a human cancer cell line. Mol Syst Biol. 2011;7:548.
	AIP1	9739		BCAR1	29286	Kulak, 2014		Beck M, Schmidt A, Malmstroem J, Claassen M, Ori A, Szymborska A, et al. The quantitative proteome of a human cell line. Mol Syst Biol. 2011;7:549.
	AKL1	1307		CAMK2A	#N/A			Wisniewski JR, Hein MY, Cox J, Mann M. A "proteomic ruler" for protein copy number and concentration estimation without spike-in standards. Mol Cell Proteomics. 2014;13(12):3497-506.
	APL1	319		CASP9	63095	Kulak, 2014
	APL3	426		CAV1	28070	Kulak, 2014
	APM4	298		CAV2	5593	Kulak, 2014
	APP1	70		CBL	30423	Kulak, 2014
	APS2	78		CBLB	1227	Kulak, 2014
	ARC15	8217		CDC42	1010502	Kulak, 2014
	ARC18	15195		CREB1	8461	Kulak, 2014
	ARC19	1583		CRK	180641	Kulak, 2014
	ARC35	8495		CSK	198129	Kulak, 2014
	ARC40	5066		DNM1	113	Kulak, 2014
	ARK1	346		DUSP1	2459	Hein, 2015
	ARP2	11254		EGF	#N/A
	ARP3	8098		EGFR	92675	Kulak, 2014
	BBC1	6204		ELK1	2074	Kulak, 2014
	BSP1	458		EPN1	315	Kulak, 2014
	BZZ1	2631		EPS15	72354	Kulak, 2014
	CAP1	10000		EPS8	1472	Kulak, 2014
	CAP2	5445		ERRFI1	923	Kulak, 2014
	CHC1	19278		FOS	1845	Hein, 2015
	CLC1	14538		FOXO1A	59816	Nagaraj, 2011
	COF1	201066		GAB1	1531	Kulak, 2014
	CRN1	6509		GAB2	1707	Kulak, 2014
	EDE1	5964		GJA1	69294	Nagaraj, 2011
	END3	4196		GRB10	24164	Kulak, 2014
	ENT1	1750		GRB2	628016	Kulak, 2014
	ENT2	1325		GRB7	460	Kulak, 2014
	GTS1	2007		HRAS	131924	Kulak, 2014
	INP52	393		JAK2	387	Kulak, 2014
	LAS17	165		JUN	4110	Beck, 2011
	LSB3	2910		KRAS	146936	Hein, 2015
	LSB5	787		KRT8	10993552	Hein, 2015
	MYO3	1841		MAP2K1	170516	Kulak, 2014
	MYO5	2219		MAP2K2	325020	Kulak, 2014
	PAL1	1230		MAP2K3	244496	Kulak, 2014
	PAN1	3357		MAP2K5	838	Hein, 2015
	PFY1	29465		MAP2K7	89412	Kulak, 2014
	PRK1	177		MAP3K1	392	Kulak, 2014
	RVS161	13654		MAP3K2	12568	Kulak, 2014
	RVS167	6020		MAP3K4	96	Kulak, 2014
	SAC6	30402		MAPK1	544669	Kulak, 2014
	SCD5	46		MAPK14	242167	Kulak, 2014
	SCP1	2456		MAPK3	58855	Kulak, 2014
	SLA1	2964		MAPK7	1060	Kulak, 2014
	SLA2	3904		MAPK8	31107	Kulak, 2014
	SYP1	2467		MYC	27128	Kulak, 2014
	TWF1	4975		NCK1	49266	Kulak, 2014
	VRP1	473		NRAS	32806	Kulak, 2014
	YAP1801	357		PAK1	7259	Kulak, 2014
	YAP1802	264		PIK3CA	5982	Kulak, 2014
	YSC84	1833		PIK3CB	1787	Kulak, 2014
				PIK3CD	158	Kulak, 2014
				PIK3CG	#N/A
				PIK3R1	448	Kulak, 2014
				PIK3R2	16715	Kulak, 2014
				PIK3R3	2060	Kulak, 2014
				PLCG1	69601	Hein, 2015
				PLCG2	5957	Hein, 2015
				PLD1	3278	Kulak, 2014
				PLD2	6520	Kulak, 2014
				PRKCA	27673	Kulak, 2014
				PRKCB1	#N/A
				PRKCG	121760	Nagaraj, 2011
				PRKCI	72034	Kulak, 2014
				PRKCZ	3801	Kulak, 2014
				PTK2B	5423	Kulak, 2014
				PTPN11	299893	Kulak, 2014
				PTPN5	#N/A
				PTPN6	4198	Kulak, 2014
				PTPRR	10058	Kulak, 2014
				PXN	94096	Kulak, 2014
				RAB5A	68671	Kulak, 2014
				RAC1	1675011	Kulak, 2014
				RAF1	35757	Kulak, 2014
				RALB	27800	Kulak, 2014
				RALBP1	11288	Kulak, 2014
				RALGDS	#N/A
				RASA1	26455	Kulak, 2014
				RGS16	#N/A
				RPS6KA1	400730	Kulak, 2014
				RPS6KA3	112170	Kulak, 2014
				SH3GL2	4333	Kulak, 2014
				SH3KBP1	89628	Kulak, 2014
				SHC1	111966	Kulak, 2014
				SMAD2	139990	Kulak, 2014
				SMAD3	3425	Kulak, 2014
				SOS1	7565	Kulak, 2014
				SOS2	144	Kulak, 2014
				SP1	248	Kulak, 2014
				SPRY2	#N/A
				SRC	1220	Kulak, 2014
				STAT1	201741	Kulak, 2014
				STAT3	241307	Kulak, 2014
				STAT5A	135833	Kulak, 2014
				STAT5B	31869	Kulak, 2014
				TNK2	646	Kulak, 2014
				USP6NL	1818	Kulak, 2014
				VAV1	59	Kulak, 2014
				VAV2	106531	Kulak, 2014
				VAV3	167890	Nagaraj, 2011
				WASL	93628	Kulak, 2014
				YWHAB	3298759	Kulak, 2014
				RIN1	65438	Kulak, 2014
				RALA	589879	Kulak, 2014
				DUSP4	#N/A
				DUSP6	#N/A
				BRAF	785	Kulak, 2014
				KSR1	954	Kulak, 2014
				PDPK1	24665	Kulak, 2014
				PRKCE	768
				BAD	22271	Kulak, 2014
				RHOA	358430	Kulak, 2014
				ARHGEF7	100897	Kulak, 2014
				MAP3K11	513	Kulak, 2014
				MAP2K4	72580	Kulak, 2014
				MAP2K6	77223	Kulak, 2014
				LIMK1	4809	Kulak, 2014
				ARHGAP3	#N/A
				P53	4220	Beck, 2011
				ERBB2	835	Kulak, 2014
				ERBB3	1823	Wisniewski, 2014
				ERBB4	#N/A
